# Supplementary material for: Evaluation of Antimicrobial Properties, Cell Viability, and Metalloproteinase Activity of Bioceramic Endodontic Materials Used in Vital Pulp Therapy
Source: MDPI journal article supplement (doi:10.3390/jfb15030070), 2024-03-14
Supplement: s1 [file s1]

Supplementary Materials

# Evaluation of Antimicrobial Properties, Cell Viability, and Metalloproteinase Activity of Bioceramic Endodontic Materials Used in Vital Pulp Therapy

Felipe Immich <sup>1</sup>, Durvalino de Oliveira <sup>2</sup>, Juliana Silva Ribeiro de Andrade<sup>1</sup>, Andressa da Silva Barboza <sup>1</sup>, Carlos Enrique Cuevas-Suárez <sup>3</sup>, Adriana Fernandes da Silva <sup>1</sup>, Wellington Luiz de Oliveira da Rosa <sup>1</sup>, Álvaro Henrique Borges <sup>2</sup>, Neftali Lenin Villarreal Carreno <sup>4</sup>, Evandro Piva <sup>1,4</sup> and Rafael Guerra Lund <sup>1,4,\*</sup>

- <sup>1</sup> Graduate Program in Dentistry, School of Dentistry, Federal University of Pelotas (UFPEL), Pelotas 96015-560, Brazil; felipe.immich@ufpel.edu.br (F.I.); juliana.r.andrade@ufsc.br (J.S.R.d.A.); andressa.barboza@posgrad.ufsc.br (A.d.S.B.); adriana@ufpel.edu.br (A.F.d.S.); wellingtonlfo@ufpel.edu.br (W.L.d.O.d.R.); piva@ufpel.edu.br (E.P.)
  - <sup>2</sup> Graduate Program in Dentistry, School of Dentistry, University of Cuiabá (UNIC), Cuiabá 78000-000, Brazil; durvalinooliveira@gmail.com (D.d.O.); alvarohborges@gmail.com (Á.H.B.)
  - <sup>3</sup> Graduate Program in Dentistry, School on Dentistry, Autonomous University of State of Hidalgo, San Agustín Tlaxiaca, Pachuca de Soto 42080, Mexico; cecuevas@uaeh.edu.mx
  - <sup>4</sup> Graduate Program in Materials Science and Engineering, Technological Development Center, Federal University of Pelotas (UFPEL), Pelotas 96010-610, Brazil; neftali@ufpel.edu.br
- \* Correspondence: rglund@ufpel.edu.br; Tel.: + 55-53-99125-7668.

**Citation:** Immich, F.; de Oliveira, D.; Ribeiro de Andrade, J.S.; da Silva Barboza, A.; Cuevas-Suárez, C.E.; da Silva, A.F.; de Oliveira da Rosa, W.L.; Borges, Á.H.; Carreno, N.L.V.; Piva, E.; et al. Evaluation of Antimicrobial Properties, Cell Viability and Metalloproteinase Activity of Bioceramic Endodontic Materials Used in Vital Pulp Therapy. *J. Funct. Biomater.* **2024**, *15*, 70. <https://doi.org/10.3390/jfb15030070>

Academic Editor: Daniele Botticelli

Received: 23 January 2024

Revised: 27 February 2024

Accepted: 07 March 2024

Published: 14 March 2024

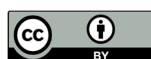

**Copyright:** © 2024 by the authors. Licensee MDPI, Basel, Switzerland. This article is an open access article distributed under the terms and conditions of the Creative Commons Attribution (CC BY) license (<https://creativecommons.org/licenses/by/4.0/>).

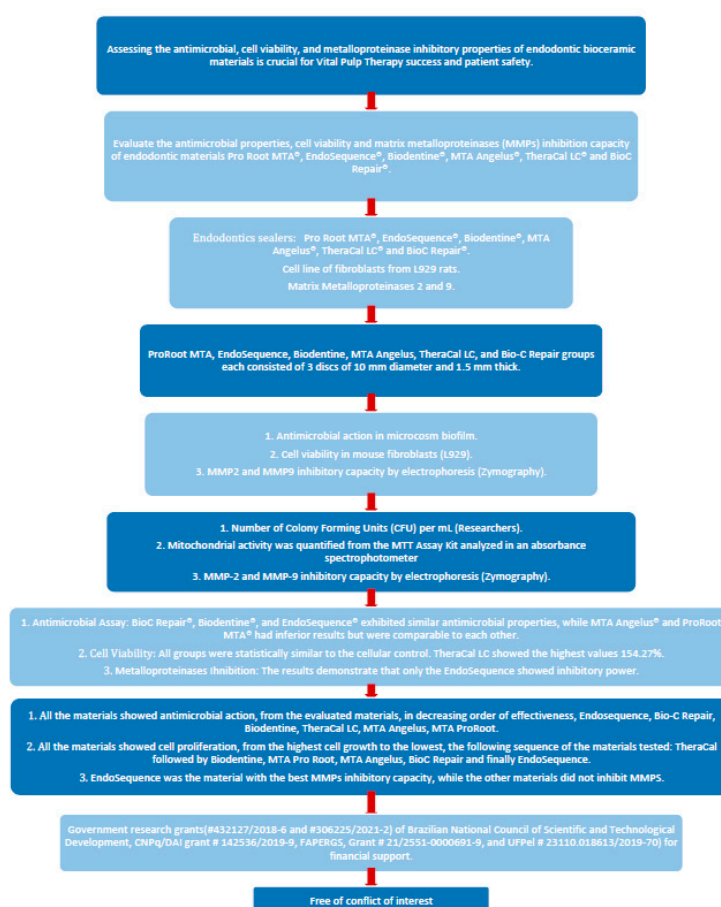

**Figure S1.** Flowchart according to the Preferred Reporting Items for Laboratory studies in Endodontology (PRILE) 2021 Guidelines.

**Table S1.** Description of polyacrylamide gel reagents.

| Reagent/Solution                          | Manufacturer      | Separation Gel | Starting Gel |
|-------------------------------------------|-------------------|----------------|--------------|
| Distilled water                           |                   | 3.33 mL        | 1.66 mL      |
| 30% Acrylamide + 0.8% Bisacrylamide       | Vetec; Invitrogen | 4.00 mL        | 0.66 mL      |
| Separation gel buffer (Tris-HCl) pH 8.8   | Vetec             | 2.66 mL        |              |
| Starting gel buffer (Tris-HCl) pH 6.8     | Vetec             |                | 0.66 mL      |
| Gelatin                                   | Vetec             | 100.00 µl      |              |
| TEMED (N, N, N', N'-Tetramthylenediamine) | Vetec             | 33.33 µl       | 3.33 µl      |
| Ammonium persulfate 20%                   | Vetec             | 66.66 µl       | 17 µl        |

Vetec Indústria e Comércio, Duque de Caxias, RJ, Brazil. Invitrogen: Carlsbad, California USA.

**Table S2.** Running buffer.

| Reagent/Solution | Manufacturer | Quantity   |
|------------------|--------------|------------|
| Glycine          | Vetec        | 36.00 g    |
| SDS              | Vetec        | 2.50 g     |
| Tris-Base        | Vetec        | 7.55 g     |
| Distilled water  | Vetec        | qsp 500 mL |

Vetec Indústria e Comércio, Duque de Caxias, RJ, Brazil. † Dilute 1:4 at the time of use, no need to adjust the pH.

**Table S3.** 2% Triton Solution †.

| Reagent/Solution | Manufacturer | Quantity |
|------------------|--------------|----------|
| Triton-X         | Vetec        | 10 mL    |
| Distilled Water  |              | 500 mL   |

Vetec Indústria e Comércio, Duque de Caxias, RJ, Brazil. † Water must be heated.

**Table S4.** Incubation Buffer †.

| Reagent/Solution | Manufacturer | Quantity |
|------------------|--------------|----------|
| CaCl             | Synth        | 1.00 mL  |
| Tris HCl (1M)    | Vetec        | 2.00 mL  |
| Distilled water  | Vetec        | 197 mL   |

Vetec Indústria e Comércio, Duque de Caxias, RJ, Brazil. Synth, Diadema, SP, Brazil. † Adjust pH to 7.4.

**Table S5.** Dye Solution.

| Reagent/Solution | Manufacturer | Quantity   |
|------------------|--------------|------------|
| Methanol         | Vetec        | 50%        |
| Acetic Acid      | Synth        | 25%        |
| Coomassie blue   | Vetec        | 0.1%       |
| R250             |              | qsp 500 mL |

Vetec Indústria e Comércio, Duque de Caxias, RJ, Brazil. Synth, Diadema, SP, Brazil.

**Table S6.** Bleaching Solution.

| Reagent/Solution | Manufacturer | Quantity   |
|------------------|--------------|------------|
| Methanol         | Vetec        | 30%        |
| Acetic Acid      | Synth        | 10%        |
| Distilled water  |              | qsp 1000mL |

Vetec Indústria e Comércio, Duque de Caxias, RJ, Brazil. Synth, Diadema, SP, Brazil.

**Disclaimer/Publisher's Note:** The statements, opinions and data contained in all publications are solely those of the individual author(s) and contributor(s) and not of MDPI and/or the editor(s). MDPI and/or the editor(s) disclaim responsibility for any injury to people or property resulting from any ideas, methods, instructions or products referred to in the content.
